# Supplementary material for: Whole-Genome Sequencing Analysis of a stx-Negative Escherichia coli O63:H6 Isolate Associated with Hemolytic Uremic Syndrome
Source: MDPI journal article supplement (doi:10.3390/diagnostics11101823), 2021-10-02
Supplement: s1 [file s1]

## Supplementary Materials

**Supplementary Table S1.** Primers used for detection of *stx1*, *stx2*, *stx2f*, and *eae*

| Target gene  | Sequence (5'→3')          |
|--------------|---------------------------|
| <i>stx1</i>  | CGTACGGGGATGCAGATAAATCGC  |
|              | CAGTCATTACATAAGAACGCCCAC  |
| <i>stx2</i>  | GTTCTGCGTTTTGTCACTGTCAC   |
|              | GTCGCCAGTTATCTGACATTCTGG  |
| <i>stx2f</i> | AGATTGGGCGTCATTCCTGGTTG   |
|              | TACTTTAATGGCCGCCCTGTCTCC  |
| <i>eae</i>   | CCCGAATTCGGCACAAGCATAAGC  |
|              | CCCGGATCCGTCTCGCCAGTATTCG |
